# Supplementary material for: Cell aggregation induces phosphorylation of PECAM-1 and Pyk2 and promotes tumor cell anchorage-independent growth
Source: Springer Nature journal article supplement (doi:10.1186/1476-4598-9-7), 2010-01-14

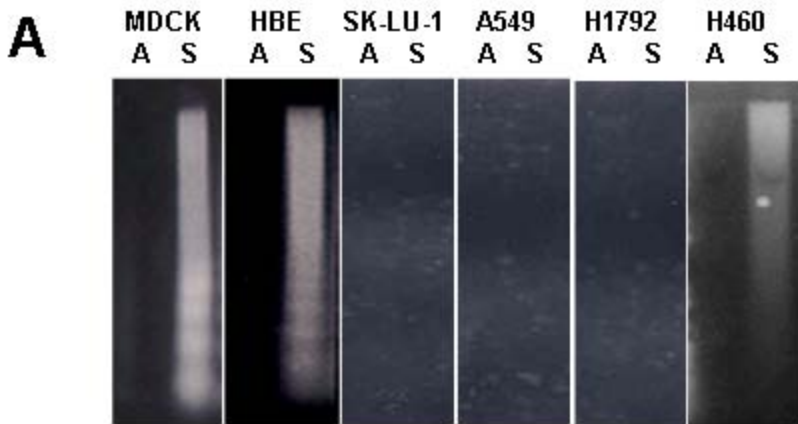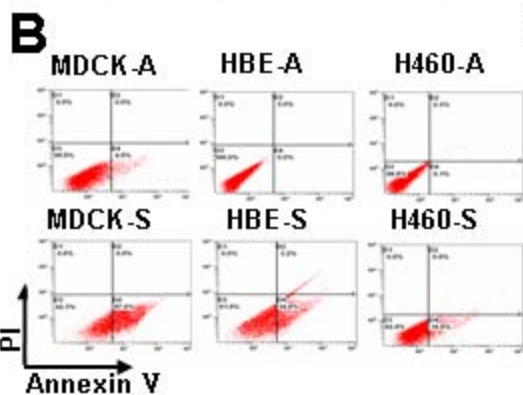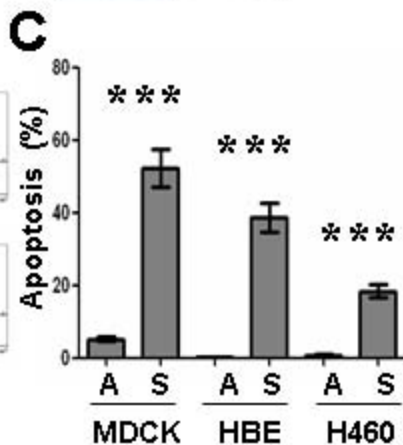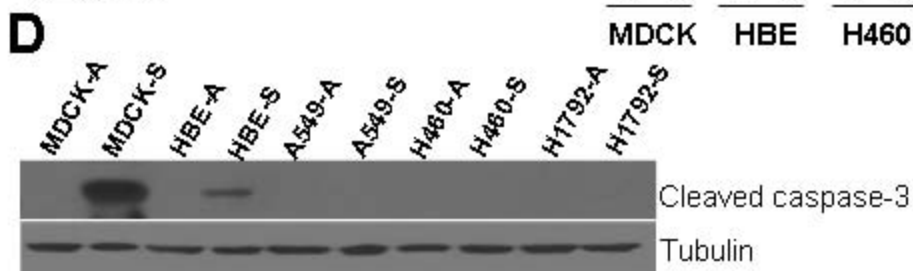

Supplement: 12943_2009_522_MOESM4_ESM.pdf [file 12943_2009_522_MOESM4_ESM.pdf]
