# Supplementary material for: Cell aggregation induces phosphorylation of PECAM-1 and Pyk2 and promotes tumor cell anchorage-independent growth
Source: Mol Cancer. 2010 Jan 14;9:7. doi: 10.1186/1476-4598-9-7 (PMC2820017; doi:10.1186/1476-4598-9-7)
Supplement: Additional file 1 — Expression of Pyk2 and PECAM in non-cancerous and cancer cells. HBE, MDCK, SK-LU-1, A549, H1792 or H460 cells were cultured on 60-mm regular and polyHEMA-coated dishes for 15 h. Cell lysates were resolved by SDS-PAGE and analyzed by immunoblotting with anti Pyk 2, anti-PECAM, or anti-tubulin antibodies as indicated. [file 1476-4598-9-7-S1.pdf]

MDCK-A

MOCK-S  
HYD

HB E-A

HBES

4549-A

4549-S

SK-LU-7-A

SK-LU-1-S  
H460

H460-A

H460-S

47792-A

47792-S

# PECAM-1

pyk2

# Tubulin
